# Supplementary material
Source: HighWire-hosted journal article supplement (https://stel.bmj.com/content/bmjstel-2017-000243)
Supplement: inline-supplementary-material-1 [file inline-supplementary-material-1.pdf]

| Case 1 - Shock: You will be treating a 15kg 1-year-old presenting with tachycardia, hypotension, and fever.                                                                                                                                         |                                                                                                                                                                                                                                                                        |                  |          |               |
|-----------------------------------------------------------------------------------------------------------------------------------------------------------------------------------------------------------------------------------------------------|------------------------------------------------------------------------------------------------------------------------------------------------------------------------------------------------------------------------------------------------------------------------|------------------|----------|---------------|
| Task                                                                                                                                                                                                                                                | Expected                                                                                                                                                                                                                                                               | Time to complete | Max time | # of attempts |
| 1. Obtain supplies for IV placement in a 15kg child. Also obtain equipment for drawing a blood gas, CBC, and BMP. The equipment should include the following: Gloves, IV Kit, flush syringe, angiocatheter, purple /green tubes, blood gas syringe. | Find: <ol style="list-style-type: none"> <li>gloves</li> <li>IV Kit (tourniquet, gauze, small tegaderm, alcohol swab/chloraprep, microbore tubing)</li> <li>Flush syringe</li> <li>angiocatheter</li> <li>purple and green tubes</li> <li>Blood gas syringe</li> </ol> |                  | 1min     |               |
| 2. Assemble and set up the necessary equipment for me to manually give a 300ml normal saline bolus via the push-pull method using a 3-way stopcock.                                                                                                 | <ol style="list-style-type: none"> <li>Assemble NS drip, IV line, 3-way stopcock, and 60ml syringe.</li> </ol>                                                                                                                                                         |                  | 3 min    |               |
| 3. Assemble equipment and start a dopamine infusion for a 15kg child at 5 mcg/kg/min.                                                                                                                                                               | <ol style="list-style-type: none"> <li>Find dopamine pre-mixed solution and start delivery at 5mcg/kg/min via pump.</li> </ol>                                                                                                                                         |                  | 3min     |               |
| 4. Prepare epinephrine infusion for a 15kg child at 0.1mcg/kg/min.                                                                                                                                                                                  | <ol style="list-style-type: none"> <li>Prepare epinephrine infusion (6mg (6ml) in 44 of D5W to total of 50ml).</li> <li>Program syringe pump to run at 0.1mcg/kg/min</li> <li>Label medication</li> </ol>                                                              |                  | 5 min    |               |
| Case 2 – Hypoglycemia. 2 cases of hypoglycemia for 2 different age children                                                                                                                                                                         |                                                                                                                                                                                                                                                                        |                  |          |               |
| Task                                                                                                                                                                                                                                                | Expected                                                                                                                                                                                                                                                               | Time to complete | Max time | # of attempts |
| 1. Draw up 10ml of D10 for a 5kg 1-month-old with hypoglycemia (2ml D10/kg).                                                                                                                                                                        | <ol style="list-style-type: none"> <li>Draw up and assemble 10ml of D10W for a 5 kg infant with hypoglycemia. (2ml D10/kg).</li> <li>Label medication</li> </ol>                                                                                                       |                  | 1 min    |               |
| 2. Draw up 20ml of D50 to a 20kg 4-year-old with hypoglycemia (1ml D50/kg).                                                                                                                                                                         | <ol style="list-style-type: none"> <li>Draw up 20ml of D50 for a 20kg child with hypoglycemia (1ml D50/kg).</li> <li>Label medication</li> </ol>                                                                                                                       |                  | 2 min    |               |
| Case 3 – Respiratory Distress: You will be treating a 1-year-old weighing 10kg.                                                                                                                                                                     |                                                                                                                                                                                                                                                                        |                  |          |               |
| Task                                                                                                                                                                                                                                                | Expected                                                                                                                                                                                                                                                               | Time to complete | Max time | # of attempts |
| 1. Attach bag-valve mask to oxygen on code cart and provide oxygen and ventilation to 10kg 1 y/o child mannequin.                                                                                                                                   | <ol style="list-style-type: none"> <li>Assemble an appropriately sized bag valve mask system for child mannequin.</li> <li>Attach to oxygen at rate needed for an infant with respiratory failure (&gt;15L/min)</li> </ol>                                             |                  | 1 min    |               |

| Task                                                                                                                                                                                                                       | Expected                                                                                                                                     | Time to complete | Max time | # of attempts |
|----------------------------------------------------------------------------------------------------------------------------------------------------------------------------------------------------------------------------|----------------------------------------------------------------------------------------------------------------------------------------------|------------------|----------|---------------|
| 2. Obtain Yankauer suction and 14 French flexible suction catheter.                                                                                                                                                        | a. Obtain and assemble Yankauer suction and a 14 French flexible suction catheter.                                                           |                  | 30 sec   |               |
| Case 4 – Respiratory Distress (Intubation): You will be treating a 1-year-old weighing 10kg by drawing up medications for intubation from the <b>airway box</b> . Please hand me a single unit dose for these medications. |                                                                                                                                              |                  |          |               |
| Task                                                                                                                                                                                                                       | Expected                                                                                                                                     | Time to complete | Max time | # of attempts |
| 1. Draw up 0.1mg of atropine for a 10kg child. Unit dosed                                                                                                                                                                  | a. Draw up 1ml of 0.1mg/ml atropine .<br>b. Label medication.                                                                                |                  | 3 min    |               |
| 2. Draw up 20mg of propofol for a 10kg child.                                                                                                                                                                              | a. Draw up 20mg of propofol.<br>b. Label medication                                                                                          |                  | 1 min    |               |
| 3. Draw up 10mg of rocuronium for a 10kg child.                                                                                                                                                                            | a. Draw up 10mg of rocuronium.<br>b. Label medication                                                                                        |                  | 1 min    |               |
| 4. Obtain equipment to place a NG tube in a 1 year-old patient. Including the following: NG tube, lubricant, 60ml syringe.                                                                                                 | Find:<br>a. NG tube<br>b. Lubricant<br>c. 60 ml Syringe                                                                                      |                  | 60 sec   |               |
| Case 5 – Ventricular fibrillation cardiac arrest: You will be treating a 4-year-old weighing 20kg.                                                                                                                         |                                                                                                                                              |                  |          |               |
| Task                                                                                                                                                                                                                       | Expected                                                                                                                                     | Time to complete | Max time | # of attempts |
| 1. Provide a firm surface underneath child mannequin in event of need for CPR.                                                                                                                                             | a. Put bed into CPR mode, remove head of bed, and place under patient.<br>-OR-<br>b. Obtain backboard and place underneath child             |                  | 30 sec   |               |
| 2. Obtain supplies for an intraosseus catheter placement including the following: Gloves, Chlorhexidine, IV tubing, IO needle, securement device, saline flush.                                                            | Find:<br>a. Gloves<br>b. Chlorhexidine<br>c. IV tubing<br>d. Intraosseus needle<br>e. Saline Flush<br>f. Securement device                   |                  | 1 min    |               |
| 3. Open pediatric defibrillator pads and describe placement. Do not remove plastic backing. Prepare defibrillator for delivery of 40 J shock.                                                                              | a. Place defibrillator pads on child mannequin (plastic not removed)<br>b. Charge defibrillator to 50J<br>c. State "I'm clear, you're clear" |                  | 3 min    |               |
| 4. Draw up 0.2mg of epinephrine for a 20kg child, (0.01mg/kg). Unit dosed                                                                                                                                                  | a. Draw up 0.2 mg epinephrine<br>b. Label medication                                                                                         |                  | 2 min    |               |
| 5. Draw up 20mg of lidocaine for a 20kg child (1mg/kg). Unit dosed                                                                                                                                                         | a. Draw up 20mg lidocaine<br>b. Label medication                                                                                             |                  | 2 min    |               |
| 6. Draw up 20 meq sodium bicarbonate for a 20kg child.                                                                                                                                                                     | a. Draw up 20 meq sodium bicarbonate (40ml of 4.2% sodium bicarb or 20ml of 8.4% sodium bicarb) and label.                                   |                  | 2 min    |               |

| 7. Draw up 400mg calcium chloride for a 20kg child (20mg/kg)                                                                                  | <ul style="list-style-type: none"> <li>a. Draw up 400mg of calcium chloride in 4ml.</li> <li>b. Label medication</li> </ul>                                                                                                                              |                  | 2 min    |               |
|-----------------------------------------------------------------------------------------------------------------------------------------------|----------------------------------------------------------------------------------------------------------------------------------------------------------------------------------------------------------------------------------------------------------|------------------|----------|---------------|
| Case 6 – Supraventricular tachycardia: You will be treating a 5-year-old weighing 18kg.                                                       |                                                                                                                                                                                                                                                          |                  |          |               |
| Task                                                                                                                                          | Expectation                                                                                                                                                                                                                                              | Time to complete | Max time | # of attempts |
| 1. Draw up 1.8mg adenosine for an 18kg child, in a unit dose and prepare for IV delivery, and state how this would be administered (0.1mg/kg) | <ul style="list-style-type: none"> <li>a. Draw up 1.8mg of adenosine (0.6ml of 3mg/ml solution).</li> <li>b. State how adenosine would be given with a rapid flush using a 3-way stop-cock or 2-flush technique.</li> <li>c. Label medication</li> </ul> |                  | 2 min    |               |
| 2. Assuming pads are already placed, charge defibrillator to 10J for synchronized cardioversion of an 18kg child.                             | <ul style="list-style-type: none"> <li>a. Charge defibrillator to 10 J for synchronized cardioversion.</li> <li>b. State “I’m clear, you’re clear”</li> </ul>                                                                                            |                  | 1 min    |               |
